# Supplementary material for: Alterations in homologous recombination repair genes in prostate cancer brain metastases
Source: PubMed Central journal article supplement (PMC9065149; doi:10.1038/s41467-022-30003-5), 2022-05-03
Supplement: 41467_2022_30003_MOESM1_ESM.pdf [file 41467_2022_30003_MOESM1_ESM.pdf]

## Supplementary Information

### Alterations in Homologous Recombination Repair Genes in Prostate Cancer Brain Metastases

Antonio Rodriguez-Calero<sup>1,2,§</sup>, John Gallon<sup>3,§</sup>, Dilara Akhoundova<sup>1,4</sup>, Sina Maletti<sup>1</sup>, Alison Ferguson<sup>1,5</sup>, Joanna Cyrta<sup>6</sup>, Ursula Amstutz<sup>7</sup>, Andrea Garofoli<sup>8</sup>, Viola Paradiso<sup>8</sup>, Scott A. Tomlins<sup>9</sup>, Ekkehard Hoyer<sup>2,10</sup>, Vera Genitsch<sup>2</sup>, Achim Fleischmann<sup>2,11</sup>, Erik Vassella<sup>2</sup>, Elisabeth J. Rushing<sup>12</sup>, Rainer Grobholz<sup>13</sup>, Ingeborg Fischer<sup>13</sup>, Wolfram Jochum<sup>14</sup>, Gieri Cathomas<sup>15</sup>, Adeboye O. Osunkoya<sup>16</sup>, Lukas Bubendorf<sup>8</sup>, Holger Moch<sup>17</sup>, George Thalmann<sup>18</sup>, Charlotte K.Y. Ng<sup>1</sup>, Silke Gillessen<sup>19,20,21#</sup>, Salvatore Piscuoglio<sup>3,8,#\*</sup>, and Mark A. Rubin<sup>1,22#\*</sup>

\* these authors contributed equally (first co-authorship)

# senior co-authorship

\* Correspondence: s.piscuoglio@unibas.ch and mark.rubin@dbmr.unibe.ch

- 1 Department for BioMedical Research, University of Bern, Bern, Switzerland
- 2 Institute of Pathology, University of Bern, Bern, Switzerland
- 3 Visceral Surgery and Precision Medicine Research Laboratory, Department of Biomedicine, University of Basel, Basel, Switzerland
- 4 Department of Medical Oncology and Hematology, University Hospital Zurich, Zurich, Switzerland
- 5 Department of Oncology, Ludwig Cancer Centre, University of Lausanne, Lausanne, Switzerland
- 6 Department of Pathology, Institut Curie, University Paris Sciences et Lettres, Paris, France
- 7 Department of Clinical Chemistry, Inselspital, Bern University Hospital, University of Bern, Bern, Switzerland
- 8 Institute of Medical Genetics and Pathology, University Hospital Basel, University of Basel, Switzerland
- 9 Departments of Pathology and Urology, University of Michigan Medical School, Ann Arbor, Michigan, USA
- 10 Institute of Pathology, Lausanne University Hospital and University of Lausanne, Lausanne, Switzerland (current address)
- 11 Institute of Pathology, Cantonal Hospital Thurgau, Münsterlingen, Switzerland
- 12 Institute of Neuropathology, University Hospital Zurich, Zurich, Switzerland
- 13 Institute of Pathology, Cantonal Hospital Aarau, Aarau, Switzerland
- 14 Institute of Pathology, Cantonal Hospital St. Gallen, St. Gallen, Switzerland
- 15 Institute of Pathology, Cantonal Hospital Baselland, Liestal, Switzerland
- 16 Departments of Pathology and Laboratory Medicine, and Urology, Emory University School of Medicine, Atlanta, USA
- 17 Department of Pathology and Molecular Pathology, University Hospital Zurich, Zurich, Switzerland
- 18 Department of Urology, Inselspital, Bern University Hospital, Bern, Switzerland
- 19 Faculty of Biomedical Sciences, USI, Lugano
- 20 Department of Oncology, Cantonal Hospital St. Gallen, St. Gallen, Switzerland
- 21 Division of Cancer Sciences, University of Manchester, Manchester, United Kingdom
- 22 Bern Center for Precision Medicine, Inselspital, Bern University Hospital, University of Bern, Switzerland

## Supplementary Figure 1

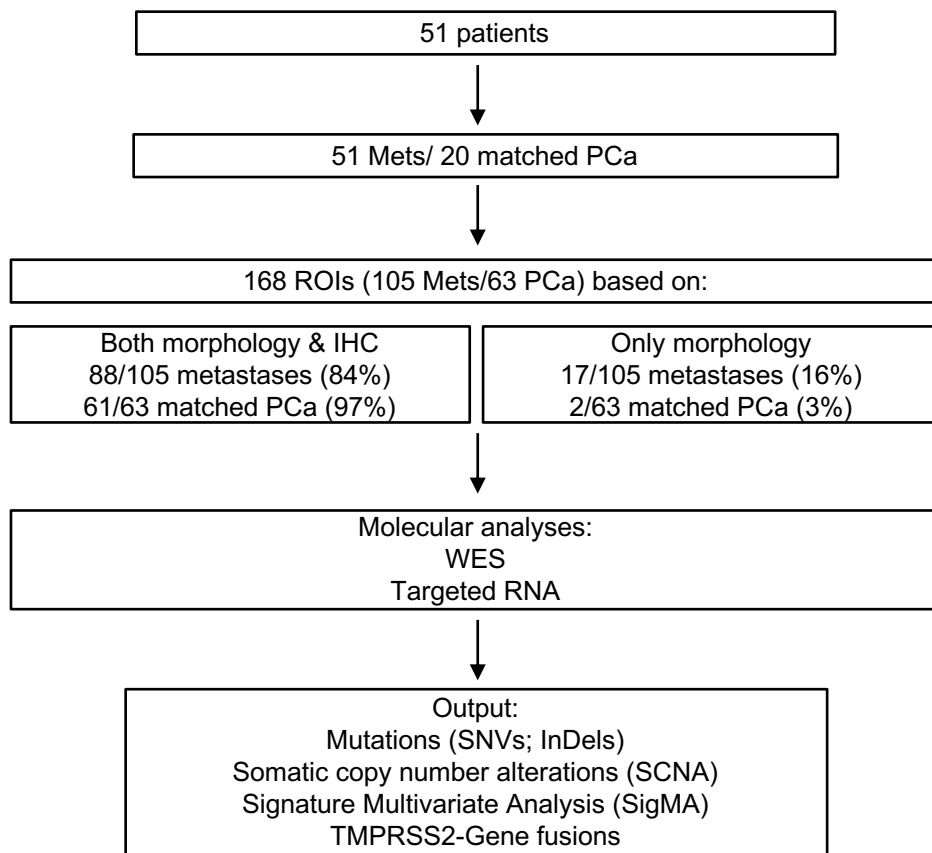

**PCBM cohort establishment and conducted methods.** For 20 of the 51 patients included, we had both metastatic and matched primary samples. A total of 168 intratumoral regions of interest (ROIs) were selected based on morphology and, whenever enough tissue was available, additional immunohistochemistry. Each defined ROI within metastases (105 ROIs) and primary tumors (63 ROIs) represents one sample of this cohort. All samples underwent whole exome sequencing (WES) and targeted RNA analyses.

## Supplementary Figure 2

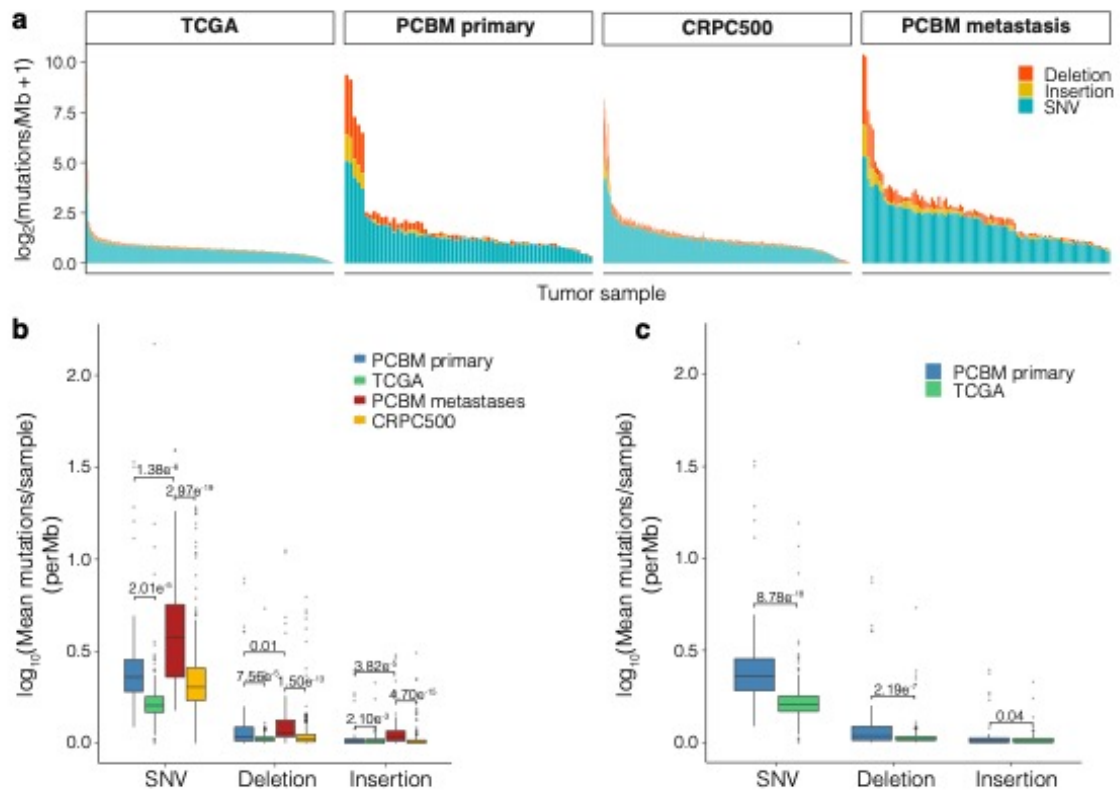

**Mutational burden in PCBM cohort. a.** Summary of tumor mutational burden for SNVs, insertions and deletions in PCBM primary, TCGA PCa primary, CRPC500 metastatic, and PCBM metastatic samples. **b.** Mean mutational burden for samples as from **a**. **c.** As in **b** but comparing only PCa primary with high grade (GG >3) TCGA samples. PCa n = 63, TCGA n = 495, TCGA GG>3 n= 286, PCBM n = 105, CRPC500 = 431. Horizontal lines in boxplots show mean, hinges show interquartile range, whiskers show 1.5 x interquartile range, points beyond 1.5 x IQR past hinge are shown Two-sided Wilcox test, FDR corrected *P* values. Source data are provided as a Source Data file.

### Supplementary Figure 3

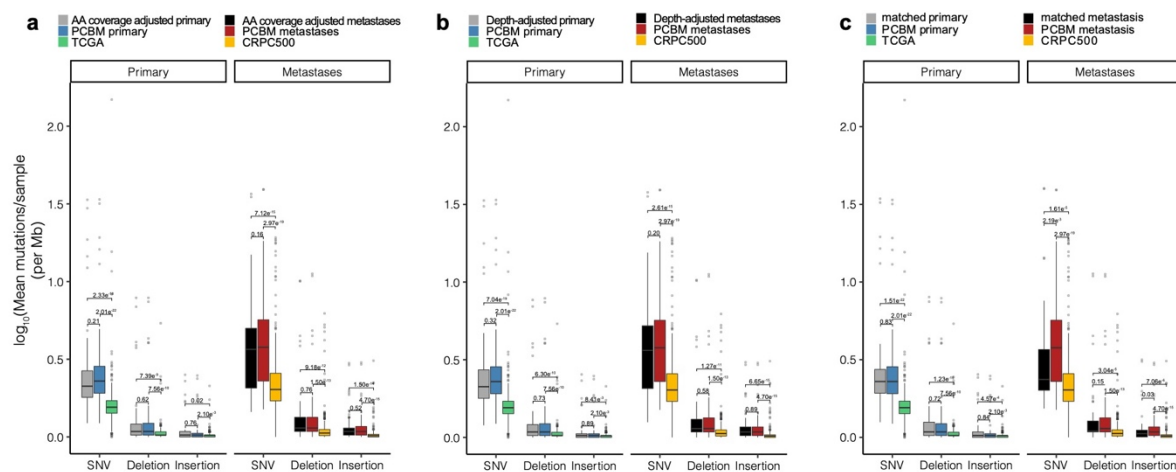

**Differences in TMB are robust to technical differences across cohorts, and the absence of matched normal for a subset of PCBM cases.** a) Mean TMB in PCBM samples, with and without adjusting for depth by increasing threshold of # supporting reads 1.6 fold above the threshold used in the CRPC500 i.e. 16 reads. PCBM samples are compared to the CRPC500 cohort (metastases) or TCGA (primary PCa) PCBM primary n = 63, TCGA n = 495, PCBM metastases n = 105, CRPC500 = 431. b) Mean TMB in PCBM samples, with and without adjusting for depth by increasing thresholds for VAF and # supporting reads 2.58-fold, compared to the CRPC500 cohort (metastases) or TCGA (primary PCa). PCBM primary n = 63, TCGA n = 495, PCBM metastases n = 105, CRPC500 = 431. c) Mean TMB in PCBM samples (whole cohort), or only those for which matched normal tissue was available, compared to the TCGA (PCa) or CRPC500 cohort (metastases). PCBM primary n = 63, matched primary n = 61, TCGA n = 495, PCBM metastases n = 105, matched metastases n = 62, CRPC500 n = 431). Horizontal lines in boxplots show mean, hinges show interquartile range, whiskers show 1.5 x interquartile range, points beyond 1.5 x IQR past hinge are shown. Two-sided Wilcoxon test, FDR adjusted P values.

## Supplementary Figure 4

a

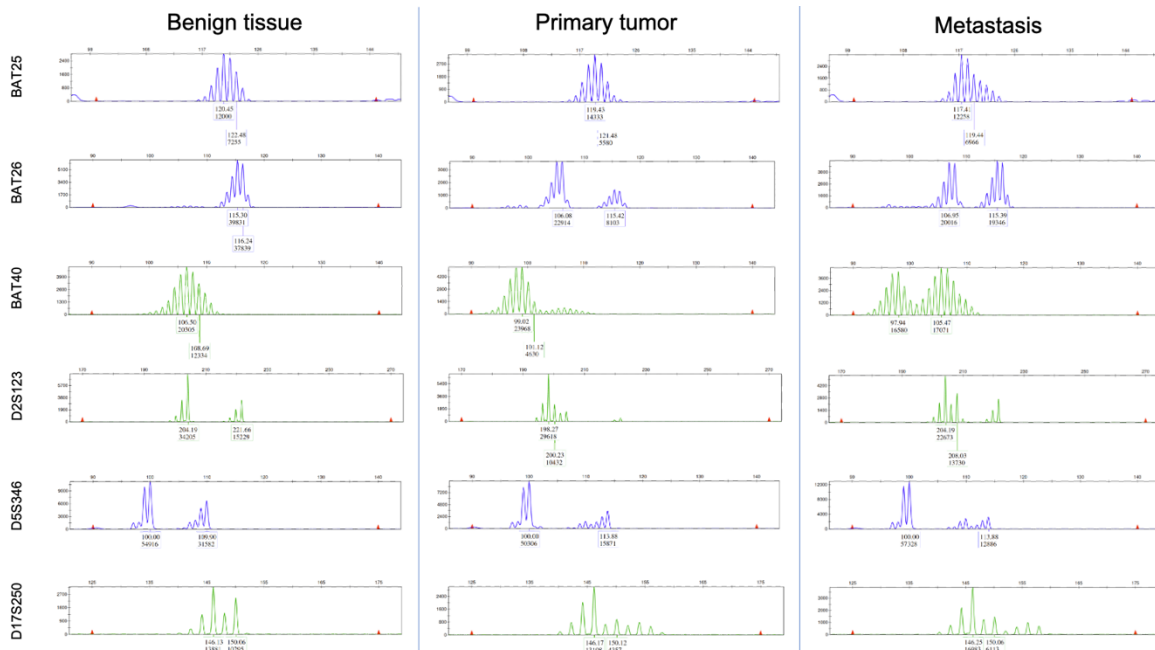

b

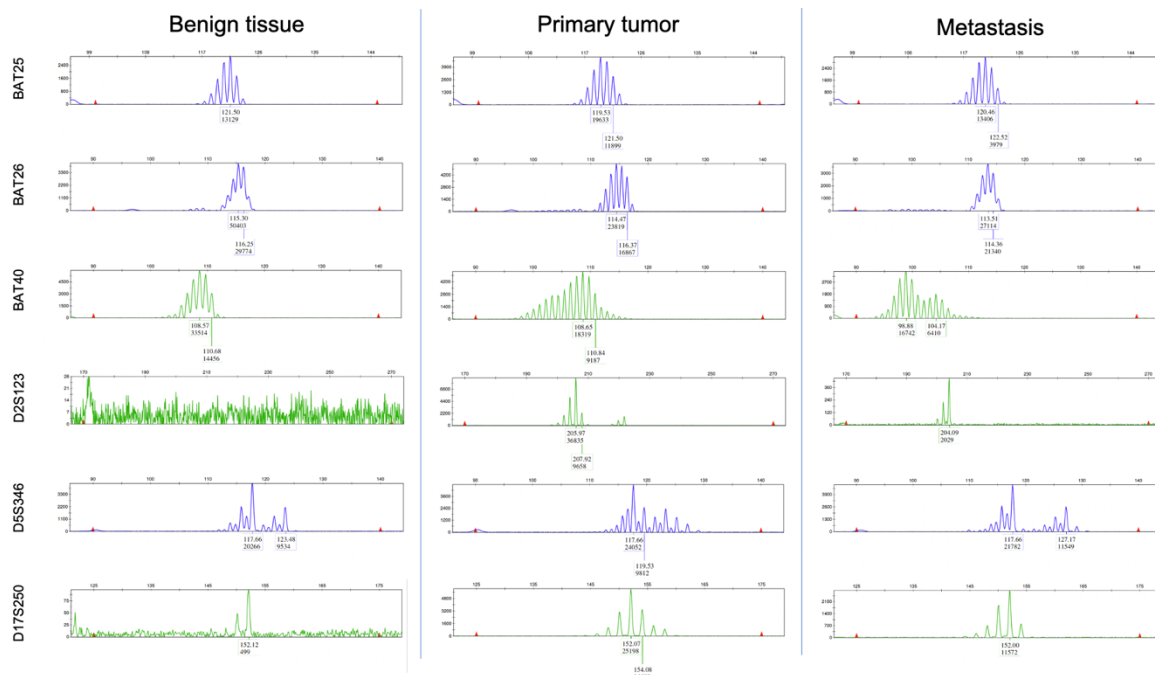

**Microsatellite instability.** MSI was assessed for patient 39 (a) and 48 (b) from primary tumor, brain metastasis and matched benign tissue by using five microsatellite loci recommended by the Bethesda panel plus BAT40. PCR products were analyzed by capillary electrophoresis using a 3500 genetic analyzer (Applied Biosystems). Both patients showed high microsatellite instability (MSI-H) status in the tumor components, primary tumor and metastasis, compared with the matched benign tissue.

## Supplementary Figure 5

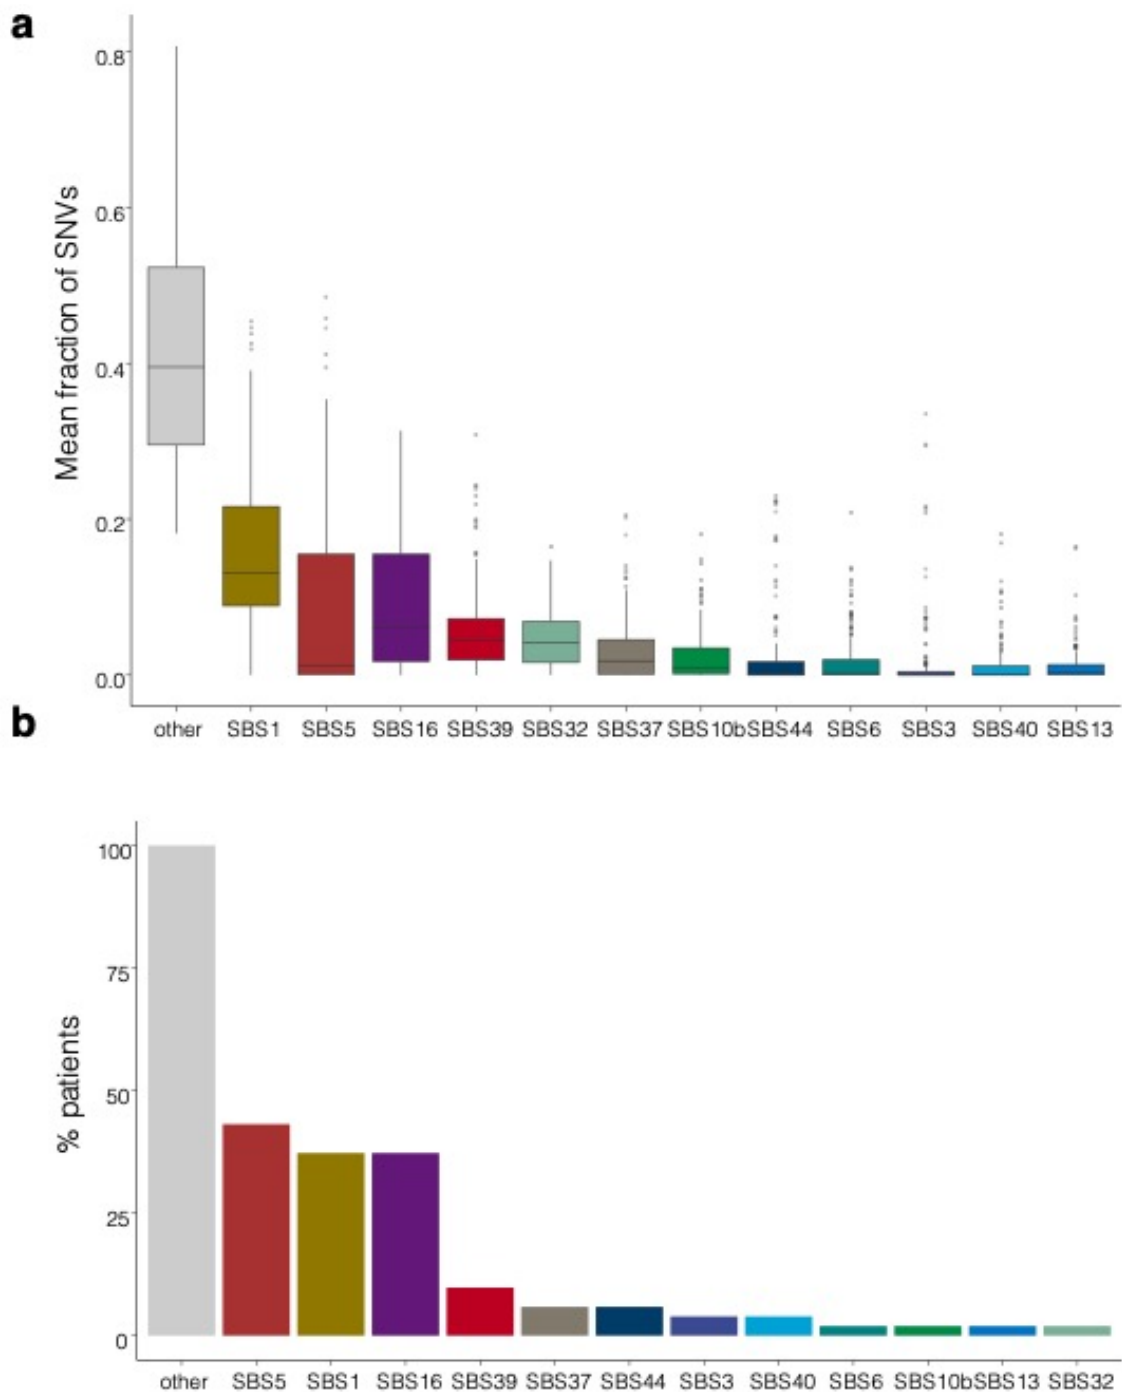

**Mutational signatures present in the PCBM cohort. a.** Relative contribution of mutational signatures in the PCBM cohort, ordered by mean contribution. Signatures with relative contribution > 0.15 in at least one sample are shown. Signatures were calculated as the average from deconstructSigs and Mutational Patterns. Horizontal lines in boxplots show median, hinges show interquartile range, whiskers show 1.5 x interquartile range, points beyond 1.5 x IQR past hinge are shown **b.** Percentage of patients in which each signature was detected. Signatures with relative contribution > 0.15 in at least one sample are shown. N=51 patients. Source data are provided as a Source Data file.

**Supplementary Figure 6**

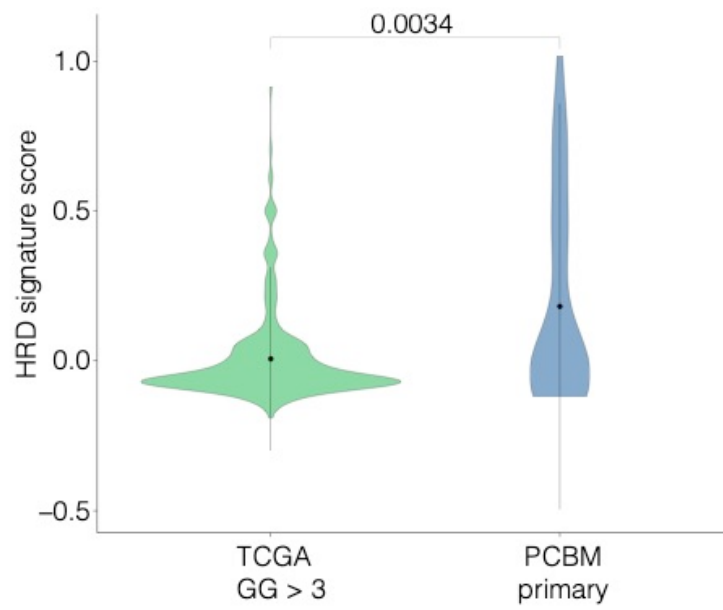

**Comparison of SBS3 signature score in PCa primary samples from the PCBM cohort and high grade TCGA samples.** Points show mean, lines show data range. TCGA n = 286, PCa n = 20. Source data are provided as a Source Data file.

**Supplementary Figure 7**

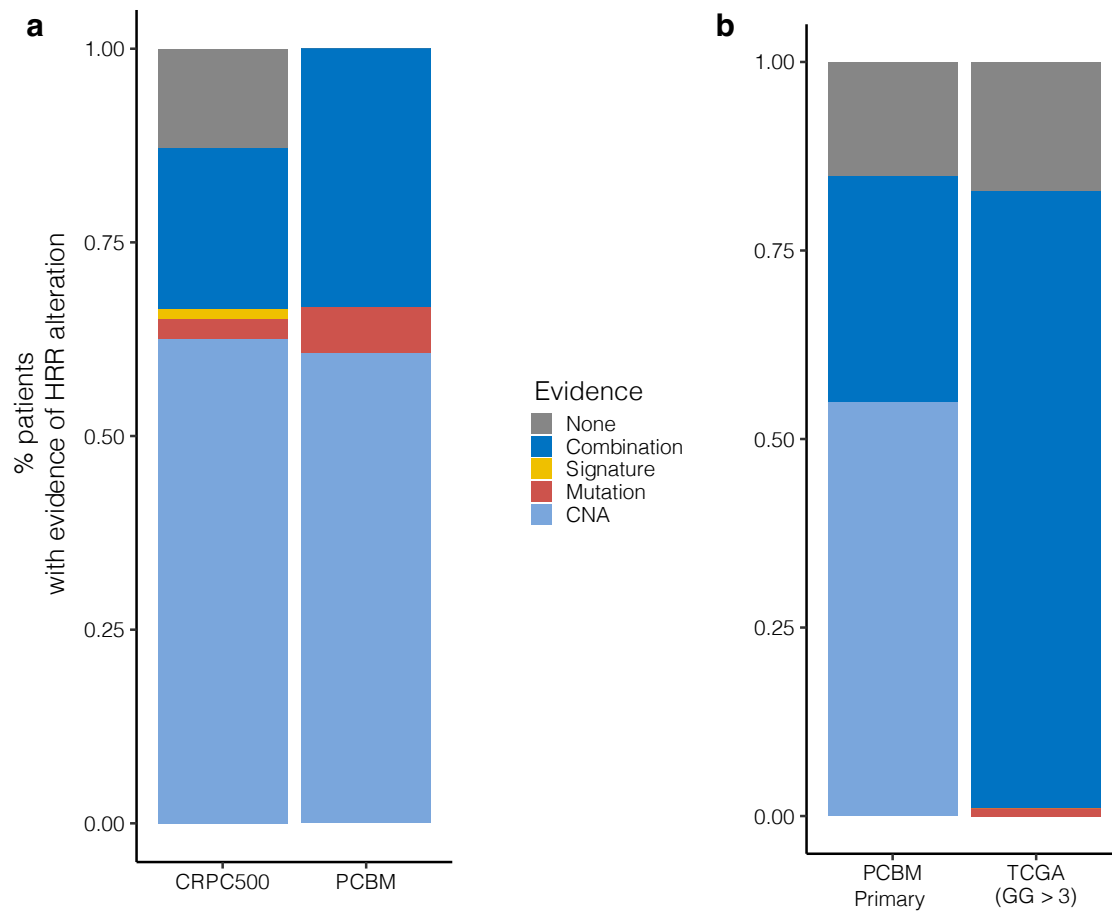

**Frequency of HRR gene alterations and presence of SBS3 across cohorts. a.** PCBM and CRPC500 non-brain metastases. PCBM n = 51, CRPC500 n = 416. **b.** Primaries from PCBM cohort and TCGA high grade samples (PCa n=20, TGCA n=281). Source data are provided as a Source Data file and in Supplementary Table 4 and 5.



## Supplementary Figure 8

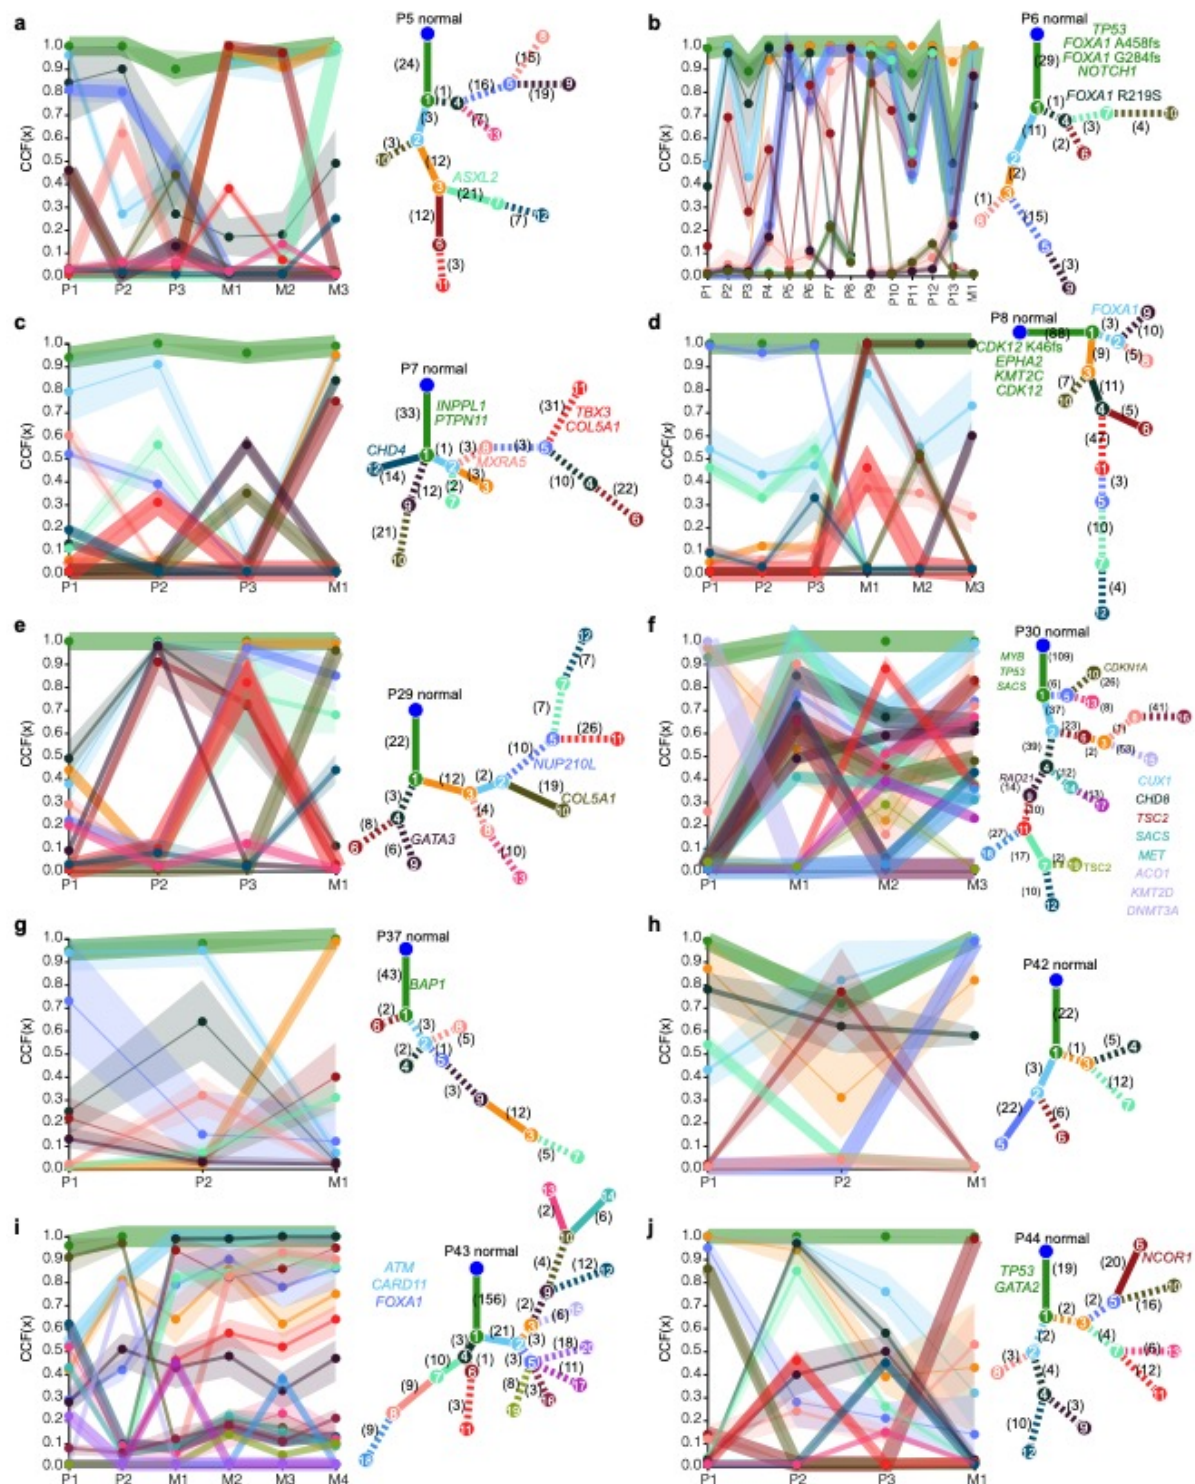

**Clonal evolution in ten PCBM cases with matched primary and metastatic samples.** Trace plots show cancer cell fraction (CCF) for each mutational cluster in each sample from each patient a-j (P = primary, M = metastasis). Ribbons show 95 % confidence interval, centre of bands show mean cluster CCF estimate. Phylogenetic trees show best solution for evolutionary relationship between clones with different clusters of mutations where each node (numbered) is a cluster of mutations. Numbers on each branch show the number of mutations distinguishing a clone from the previous (all genes). Potential driver genes mutated in the distinction between a clone and the previous are indicated in colours corresponding to the branch. Solid branches show clusters of mutations which become clonal in metastatic samples. Source data are provided as a Source Data file.

## Supplementary Figure 9

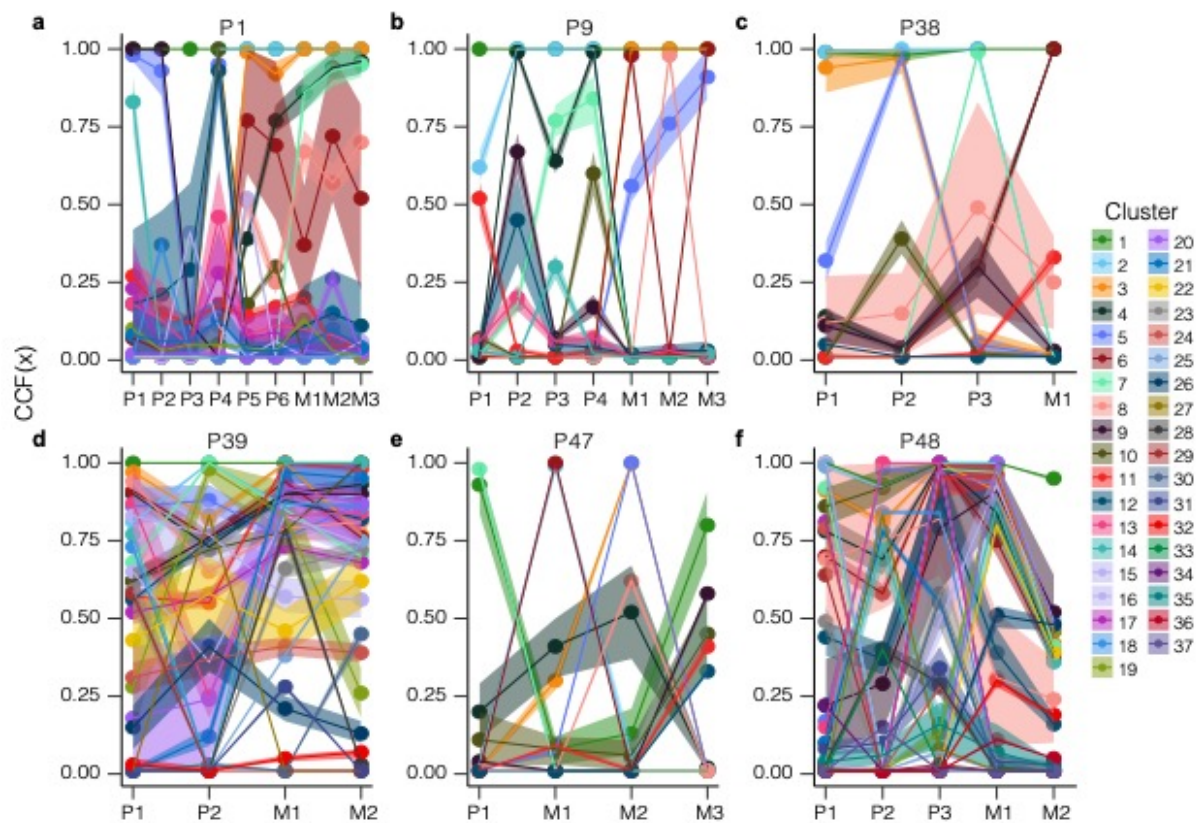

**Cancer cell fraction of mutation clusters in six PCBM cases for which tree solutions could not be calculated.** Trace plots a-f show CCF for each mutational cluster in each patient sample (P = primary, M = metastasis). Ribbons show 95 % confidence interval, centre of bands shows mean cluster CCF estimate. Source data are provided as a Source Data file.

## Supplementary Figure 10

**a**

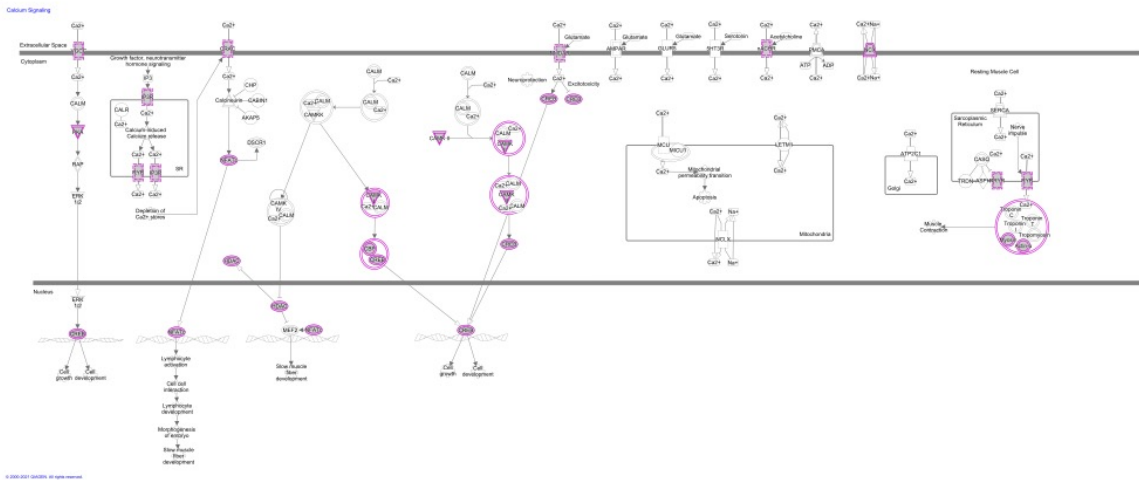

FAT10 Cancer Signaling Pathway

FAT10 (UBD) is overexpressed in many malignancies, and promotes carcinogenesis by increasing survival, proliferation, invasion, and metastase formation of tumor cells.

**b**

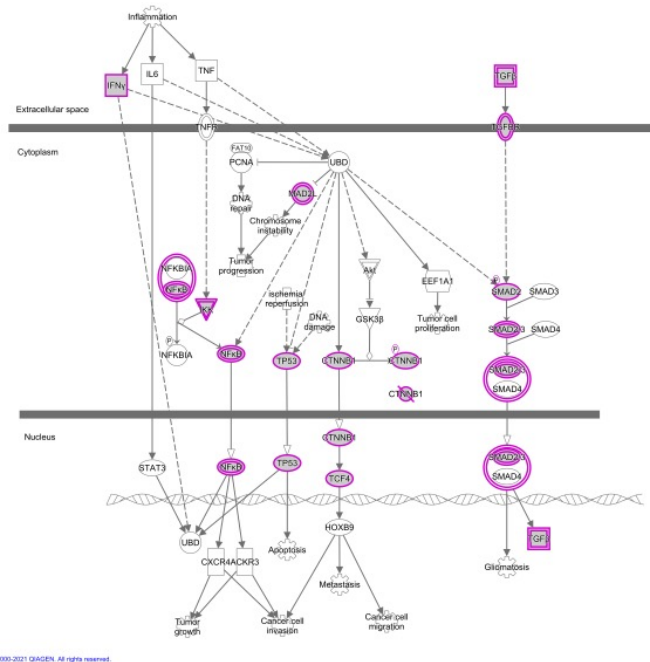

**Canonical pathways enriched for alterations in metastatic-clonal clusters.** Diagrams from Ingenuity Pathway Analysis showing canonical pathways (a) calcium signaling and (b) FAT10 signaling enriched for metastatic clonal mutations in PCBM. Altered molecules are highlighted in pink.

**Supplementary Table 1. Demographic data and analysed tissue**

| Patient-N | Research ID | Primary tumor available | Number CNS metastases | Location                                          | In this study included type      | Additional non-brain metastases                  | ADT or orchidectomy | Abiraterone | Enzalutamide |
|-----------|-------------|-------------------------|-----------------------|---------------------------------------------------|----------------------------------|--------------------------------------------------|---------------------|-------------|--------------|
| 1         | 19.1        | YES                     | Singular              | Fronto-parietal right                             | Dura                             | Bone                                             | Yes                 | No          | No           |
| 4         | 19.4        | YES                     | Singular              | Frontal right                                     | Dura                             | Bone                                             | Yes                 | No          | No           |
| 5         | 19.5        | YES                     | Multiple              | Cerebellar                                        | Brain                            | Bone                                             | Yes                 | No          | No           |
| 6         | 19.6        | YES                     | Singular              | Cerebellar right                                  | Brain                            | Bone                                             | Yes                 | No          | No           |
| 7         | 19.7        | YES                     | Multiple              | Occipital left                                    | Dura with brain involvement      | Bone                                             | Yes                 | No          | No           |
| 8         | 19.8        | YES                     | Multiple              | Cerebral, NOS                                     | Brain                            | Bone                                             | Yes                 | No          | No           |
| 9         | 19.9        | YES                     | Unknown               | NA                                                | Dura                             | Unknown                                          | Yes                 | No          | No           |
| 10        | 19.10       | NO                      | Singular              | Cerebellar                                        | Brain                            | Bone (spine, pelvis)                             | Yes                 | No          | No           |
| 12        | 19.12       | NO                      | Singular              | Cerebellar right                                  | Brain                            | Unknown                                          | Yes                 | No          | No           |
| 14        | 19.14       | YES                     | Multiple              | Temporal                                          | Dura                             | Bone (spine, pelvis)                             | Yes                 | No          | No           |
| 16        | 19.16       | YES                     | Singular              | Temporal right                                    | Dura with brain involvement      | Bone, Lymph nodes                                | Yes                 | Yes         | No           |
| 17        | 19.17       | NO                      | Multiple              | Cerebral, NOS                                     | Brain                            | Bone                                             | Yes                 | Yes         | No           |
| 18        | 19.18       | NO                      | Multiple              | Cerebral, NOS                                     | Brain                            | Bone (multiple)                                  | Yes                 | Yes         | No           |
| 19        | 19.19       | NO                      | Singular              | Left temporal                                     | Brain                            | Unknown                                          | Yes                 | No          | No           |
| 20        | 19.20       | NO                      | Singular              | Left temporal                                     | Unknown                          | Bone                                             | Yes                 | No          | No           |
| 21        | 19.21       | NO                      | Singular              | Left frontal                                      | Brain                            | None                                             | No                  | No          | No           |
| 22        | 19.22       | NO                      | Singular              | Cerebellar right                                  | Brain                            | Bone, Lymph nodes                                | Yes                 | No          | No           |
| 23        | 19.23       | NO                      | Multiple              | Temporal bilateral                                | Brain                            | Bone, Liver                                      | Yes                 | No          | No           |
| 24        | 19.24       | NO                      | Multiple              | Infrasealar                                       | Dura                             | Bone, Lung                                       | Yes                 | No          | No           |
| 25        | 19.25       | NO                      | Singular              | Frontal left                                      | Dura                             | Bone, Lung                                       | Yes                 | No          | No           |
| 26        | 19.26       | NO                      | Singular              | Parietal left                                     | Brain                            | Metastasized, unknown locations                  | Yes                 | No          | No           |
| 27        | 19.27       | NO                      | Multiple              | NA                                                | Dura                             | Bone, Lymph nodes                                | Yes                 | Yes         | No           |
| 29        | 19.29       | YES                     | Singular              | Cerebellum                                        | Unknown                          | Bone, Lymph nodes                                | Yes                 | No          | No           |
| 30        | 19.30       | YES                     | Multiple              | Frontal bilateral                                 | Dura                             | Bone, Lung                                       | Yes                 | No          | No           |
| 31        | 19.31       | NO                      | Singular              | Cerebellar left                                   | Dura                             | Bone                                             | No                  | Unknown     | Unknown      |
| 32        | 19.32       | YES                     | Multiple              | Parietal/occipital right; temporal left           | Dura                             | Bone                                             | Yes                 | No          | No           |
| 33        | 19.33       | NO                      | Multiple              | Thoracic spine 4-6                                | Dura                             | Bone                                             | No                  | No          | No           |
| 34        | 19.35       | NO                      | Multiple              | Paracentral left                                  | Brain                            | Lung, Lymph nodes                                | Yes                 | Yes         | Yes          |
| 35        | 19.36       | NO                      | Multiple              | Temporal bilateral, frontal left                  | Dura with brain involvement      | Bone, Lymph nodes, Liver, Lung                   | Yes                 | No          | No           |
| 36        | 19.37       | NO                      | Multiple              | NA                                                | Brain                            | Bone, Lymph nodes                                | No                  | No          | No           |
| 37        | 19.50       | YES                     | Singular              | Fronto-basal left                                 | Brain with dura/bone involvement | Unknown                                          | Unknown             | No          | No           |
| 38        | 19.51       | YES                     | Multiple              | Cerebellum                                        | Brain                            | Lymph nodes mediastinal                          | Unknown             | No          | No           |
| 39        | 19.52       | YES                     | Singular              | Cerebellum/ ventricle IV                          | Brain                            | None                                             | No                  | No          | No           |
| 40        | 19.53       | NO                      | Singular              | Parietal right                                    | Dura/Bone                        | Bone                                             | No                  | Yes         | No           |
| 42        | 19.40       | YES                     | Multiple              | Precentral gyrus right                            | Brain                            | Bone, Lung, Pleura, Lymph node                   | Yes                 | Yes         | No           |
| 43        | 19.41       | YES                     | Multiple              | Parietal bilateral                                | Dura                             | Bone, Liver, Lymph node                          | Yes                 | Yes         | No           |
| 44        | 19.42       | YES                     | Multiple              | Frontal, Temporal, Occipital, Cerebellum, Meninge | Brain                            | Bone, Lung, Liver, Lymph node                    | Yes                 | No          | No           |
| 45        | 19.43       | YES                     | Multiple              | Parietal left, Brain stem, C1-C7, Lumbar, Sacral  | Dura                             | Bone, Liver, Muscle                              | Yes                 | No          | No           |
| 46        | 19.44       | NO                      | Multiple              | Unknown                                           | Dura                             | Bone, Lung, Liver, Spleen, Adrenal gland, Kidney | Yes                 | No          | No           |
| 47        | 19.39       | YES                     | Singular              | Frontal right                                     | Brain                            | Lymph node                                       | Yes                 | No          | No           |
| 48        | 19.48       | YES                     | Multiple              | Cerebellum                                        | Brain                            | Bone, Lymph node, Adrenal gland, Soft tissue     | Yes                 | No          | No           |
| 49        | 19.49       | YES                     | Multiple              | Frontal left                                      | Dura                             | Bone, Lung, Pleura, Muscle                       | Yes                 | No          | No           |
| 50        | 19.64       | NO                      | Singular              | Left parietal, NOS                                | Brain/Dura                       | Bone                                             | Yes                 | No          | No           |
| 51        | 19.65       | NO                      | Singular              | Frontal right                                     | Brain/Dura                       | Bone, Lung, Liver, Lymph node                    | No                  | No          | No           |
| 52        | 19.66       | NO                      | Multiple              | Spinal cord/L5                                    | Cord/Dura/Bone                   | Bone, Lung, Lymph node                           | Yes                 | Yes         | Yes          |
| 53        | 19.67       | NO                      | Multiple              | Parietal right                                    | Brain/Dura                       | Bone, Bladder (direct extension), Lymph node     | Yes                 | No          | No           |
| 54        | 19.68       | NO                      | Multiple              | Spinal cord thoracic, NOS                         | Cord/Dura/Bone                   | Bone                                             | Yes                 | Yes         | No           |
| 55        | 19.69       | NO                      | Multiple              | Spinal cord, NOS                                  | Cord/Dura/Bone                   | Bone, Lymph node                                 | Yes                 | No          | No           |
| 57        | 19.71       | NO                      | Singular              | Spinal cord thoracic, NOS                         | Cord/Dura/Bone                   | Bone, Lymph node                                 | Yes                 | No          | Yes          |
| 58        | 19.72       | NO                      | Multiple              | Spinal cord T3                                    | Cord/Dura/Bone                   | Bone                                             | Yes                 | Yes         | Yes          |
| 59        | 19.73       | NO                      | Multiple              | Spinal cord thoracic, NOS                         | Cord/Dura/Bone                   | Bone, Liver, Lymph node                          | Yes                 | No          | No           |

**Supplementary Table 2. Summary of large cohorts including metastases of prostate cancer within the last 10 years**

|    | Publication                         | N° Samples of metastatic prostate cancer |            | N° Patients of metastatic prostate cancer |                         | Methods                               |
|----|-------------------------------------|------------------------------------------|------------|-------------------------------------------|-------------------------|---------------------------------------|
|    |                                     | All locations                            | PCBM       | PCBM                                      | Matched primary to PCBM |                                       |
| 1  | Taylor et al. Cancer Cell. 2010     | 37                                       | 12         | 12                                        | No                      | Targeted DNA/RNA-seq/miRNA expression |
| 2  | Grasso et al. Nature. 2012          | 50                                       | 1          | 1                                         | No                      | Targeted-DNA/RNA-seq                  |
| 3  | Gundem et al. Nature. 2015          | 53                                       | 3          | 2                                         | 1                       | WGS                                   |
| 4  | Beltran et al. Nature Med. 2016     | 112*                                     | 4          | 3                                         | No                      | WES/RNA-seq/Targeted RNA              |
| 5  | Kumar et al. Nature Med. 2016       | 154                                      | 0          | 0                                         | n/a                     | WES/RNA-seq                           |
| 6  | Abida et al. JCO Precis Oncol. 2017 | 228                                      | 0          | 0                                         | n/a                     | Targeted DNA                          |
| 7  | Aggarwal et al. J Clin Oncol. 2018  | 249                                      | 0          | 0                                         | n/a                     | RNA-seq, Targeted DNA                 |
| 8  | Abida et al. PNAS. 2019             | 444**                                    | 1          | 1                                         | No                      | WES/RNA-seq                           |
| 9  | Van Dessel et al. Nat Commun. 2019  | 197                                      | 0          | 0                                         | n/a                     | WGS                                   |
| 10 | Mateo et al. J Clin Invest. 2019    | 61                                       | 0          | 0                                         | n/a                     | Low pass WES/Targeted-DNA             |
|    |                                     | <b>1585</b>                              | <b>21</b>  | <b>19</b>                                 | <b>1</b>                |                                       |
| 11 | <b>Current study</b>                | <b>105</b>                               | <b>105</b> | <b>51</b>                                 | <b>20</b>               | <b>WES/Targeted RNA</b>               |

Ten large cohorts including molecular analyses of metastatic prostate cancer were reviewed based on available data from cBioPortal or publications (1-10). Overlapping patients were excluded (top). Patients and samples investigated in the current study (bottom). PCBM: including metastases from following locations: brain, dura (also epidural, subdural) and spinal cord. \* 2 patients were previously published in Baca et al, Cell, 2013 (11). \*\* 150 patients were previously published in Robinson et al, Cell, 2015 (12).

**References**

1. Taylor, B.S. et al. Integrative genomic profiling of human prostate cancer. *Cancer Cell* 18, 11-22 (2010).
2. Grasso, C.S. et al. The mutational landscape of lethal castration-resistant prostate cancer. *Nature* 487, 239-43 (2012).
3. Gundem, G. et al. The evolutionary history of lethal metastatic prostate cancer. *Nature* 520, 353-357 (2015).
4. Kumar, A. et al. Substantial interindividual and limited intraindividual genomic diversity among tumors from men with metastatic prostate cancer. *Nat Med* 22, 369-78 (2016).
5. Aggarwal, R. et al. Clinical and Genomic Characterization of Treatment-Emergent Small-Cell Neuroendocrine Prostate Cancer: A Multi-institutional Prospective Study. *J Clin Oncol* 36, 2492-2503 (2018).
6. Abida, W. et al. Genomic correlates of clinical outcome in advanced prostate cancer. *Proc Natl Acad Sci U S A* (2019).
7. Beltran, H. et al. Divergent clonal evolution of castration-resistant neuroendocrine prostate cancer. *Nat Med* 22, 298-305 (2016).
8. Abida, W. et al. Prospective Genomic Profiling of Prostate Cancer Across Disease States Reveals Germline and Somatic Alterations That May Affect Clinical Decision Making. *JCO Precis Oncol* 2017(2017).
9. van Dessel, L.F. et al. The genomic landscape of metastatic castration-resistant prostate cancers reveals multiple distinct genotypes with potential clinical impact. *Nat Commun* 10, 5251 (2019).
10. Mateo, J. et al. Genomics of lethal prostate cancer at diagnosis and castration resistance. *J Clin Invest* 130, 1743-1751 (2020).
11. Baca, S.C. et al. Punctuated evolution of prostate cancer genomes. *Cell* 153, 666-77 (2013).
12. Robinson, D. et al. Integrative clinical genomics of advanced prostate cancer. *Cell* 161, 1215-1228 (2015).

**Supplementary Table 3. Patients fulfilling PROfound criteria\***

| Patients with homozygous deletion      |                               | Gen            |                        |               |                                                                                                                                                                                                                                               |                              |
|----------------------------------------|-------------------------------|----------------|------------------------|---------------|-----------------------------------------------------------------------------------------------------------------------------------------------------------------------------------------------------------------------------------------------|------------------------------|
| 57                                     | PPP2R2A                       |                |                        |               |                                                                                                                                                                                                                                               |                              |
| 27                                     | BRCA2                         |                |                        |               |                                                                                                                                                                                                                                               |                              |
| 30                                     | BRCA2                         |                |                        |               |                                                                                                                                                                                                                                               |                              |
| 45                                     | PPP2R2A                       |                |                        |               |                                                                                                                                                                                                                                               |                              |
| 47                                     | PPP2R2A, CHEK2, RAD54L, BRCA1 |                |                        |               |                                                                                                                                                                                                                                               |                              |
| 12                                     | PPP2R2A                       |                |                        |               |                                                                                                                                                                                                                                               |                              |
| Patients with truncating mutations     | Gen                           | Protein_Change | Variant_Classification | Clonal Status | ClinVar                                                                                                                                                                                                                                       | Other sources                |
| 39                                     | BRCA1                         | p.Lys339fs     | Frame_Shift_Del        | clonal        | National Center for Biotechnology Information. ClinVar; [VCV000266130.2], <a href="https://www.ncbi.nlm.nih.gov/clinvar/variation/VCV000266130.2">https://www.ncbi.nlm.nih.gov/clinvar/variation/VCV000266130.2</a> (accessed Feb. 26, 2022). |                              |
| 48                                     | BRIP1                         | p.Leu54*       | Nonsense_Mutation      | clonal        | National Center for Biotechnology Information. ClinVar; [VCV000935760.2], <a href="https://www.ncbi.nlm.nih.gov/clinvar/variation/VCV000935760.2">https://www.ncbi.nlm.nih.gov/clinvar/variation/VCV000935760.2</a> (accessed Feb. 26, 2022). |                              |
| 1                                      | BRCA2                         | p.Arg3005*     | Nonsense_Mutation      | clonal        | National Center for Biotechnology Information. ClinVar; [VCV000234445.8], <a href="https://www.ncbi.nlm.nih.gov/clinvar/variation/VCV000234445.8">https://www.ncbi.nlm.nih.gov/clinvar/variation/VCV000234445.8</a> (accessed Feb. 26, 2022). |                              |
| 8                                      | CDK12                         | p.Gln612*      | Nonsense_Mutation      | subclonal     | Not reported                                                                                                                                                                                                                                  | PMID: 33804295-Breast Cancer |
|                                        | CDK12                         | p.Lys46fs      | Frame_Shift_Del        | clonal        | Not reported                                                                                                                                                                                                                                  |                              |
| <b>Total of patients: 10/51= 19.6%</b> |                               |                |                        |               |                                                                                                                                                                                                                                               |                              |

*\*According to the Profound criteria: A patient had a qualifying alteration if any deleterious or suspected deleterious alteration was found in the 15 pre-specified genes with a direct or indirect role in HRR. An alteration was regarded as deleterious if it results in protein truncation (which includes nonsense, frameshift, or consensus splice site alterations), or select missense alterations well-known to be deleterious in ClinVar/BIC databases. Furthermore, larger-scale alterations, such as genomic truncating rearrangements or homozygous deletions, were also classified as qualifying.*

**Supplementary Table 4. Summary of the protocols used for DNA & RNA extraction, library preparation and sequencing for the different methods**

| Method                                | Reagent Kit                                                                                | Supplier     | Protocol                                                           | Page numbers | Comment                                                                          |
|---------------------------------------|--------------------------------------------------------------------------------------------|--------------|--------------------------------------------------------------------|--------------|----------------------------------------------------------------------------------|
| <b>6.1. Nucleic acid isolation</b>    |                                                                                            |              |                                                                    |              |                                                                                  |
| 6.1.1. FFPE samples                   | AllPrep DNA/RNA FFPE Kit                                                                   | Qiagen       | AllPrep FFPE DNA RNA                                               |              | Protocol for DNA and RNA isolation from one sample, used for targeted sequencing |
|                                       | QIAamp DNA Micro Kit                                                                       | Qiagen       | DNA Extraktion mit MicroKit                                        |              | DNA extraction used for WES (protocol from CGL)                                  |
| 6.1.2. Tissue or blood samples, cells | DNeasy Blood and Tissue Kit                                                                | Qiagen       | DNeasy Blood and Tissue Handbook                                   | 25 – 30      | Protocol for DNA isolation                                                       |
| <b>6.2. Sequencing</b>                |                                                                                            |              |                                                                    |              |                                                                                  |
| <i>6.2.1. Targeted RNA sequencing</i> |                                                                                            |              |                                                                    |              |                                                                                  |
| cDNA synthesis                        | SuperScript VILO                                                                           | Thermofisher | Ion Ampliseq Library Kit plus User Guide                           | 72           |                                                                                  |
| Library preparation                   | Ion Ampliseq Library Kit plus, Xpresss barcodes                                            | Thermofisher | Ion Ampliseq Library Kit plus User Guide                           | 36 – 42      |                                                                                  |
| Library QC qPCR                       | Ion Universal Library Quantitation Kit                                                     | Thermifisher | Ion Ampliseq Library Kit plus User Guide                           | 49 – 50      |                                                                                  |
| <i>6.2.2. Targeted DNA Sequencing</i> |                                                                                            |              |                                                                    |              |                                                                                  |
| Library preparation                   | Ion Ampliseq Library Kit plus, Xpresss barcodes                                            | Thermofisher | Ion Ampliseq Library Kit plus User Guide                           | 25 – 33      |                                                                                  |
| Library QC pPCR                       | Ion Universal Library Quantitation Kit                                                     | Thermofisher | Ion Ampliseq Library Kit plus User Guide                           | 49 – 50      |                                                                                  |
| <i>6.2.3. WES</i>                     |                                                                                            |              |                                                                    |              |                                                                                  |
| DNA QC                                | NGS FFPE QC Kit                                                                            | Agilent      | NGS FFPE QC                                                        | 20 – 28      | Sequencing: NovaSeq 6000 (Illumina)                                              |
| Library preparation                   | SureSelectXT Low Input Target Enrichment System for Illumina, SureSelect human all exon V7 | Agilent      | SureSelectXT Low Input Target Enrichment System with Dual Indexing | 20 – 62      |                                                                                  |
