# Supplementary material for: Alterations in homologous recombination repair genes in prostate cancer brain metastases
Source: PubMed Central journal article supplement (PMC9065149; doi:10.1038/s41467-022-30003-5), 2022-05-03
Supplement: 41467_2022_30003_MOESM3_ESM.pdf [file 41467_2022_30003_MOESM3_ESM.pdf]

### **Description of Additional Supplementary Files**

File Name: Supplementary Data 1

Description: Regions of interest (ROIs) selected including samples description, methods conducted and pathology assessment (morphology and immunohistochemistry) (n=51 patients)

File Name: Supplementary Data 2

Description: Summary mutation call and Tmprss2-gene fusions for PCBM-cohort

File Name: Supplementary Data 3

Description: Summary somatic copy number alterations SCNA for PCBM-cohort

File Name: Supplementary Data 4

Description: Summary statistics for the sequenced samples

File Name: Supplementary Data 5

Description: ETS-Tmprss2 gene fusions sequencing data
